# Supplementary material for: Health economic evidence for adjuvant chemotherapy in stage II and III colorectal cancer: a systematic review
Source: Research Square preprint supplement (doi:10.21203/rs.3.rs-1879521/v1), 2022-07-27
Supplement: Supplementary file 1 [file caf4f66c3c07b3bb872195ab.docx]

| Table 2 Summary of the study characteristics and key findings of the final sample of economic evaluations | | | | | | | | | | | | | | |
| --- | --- | --- | --- | --- | --- | --- | --- | --- | --- | --- | --- | --- | --- | --- |
|  | Stage | Publication | Country (Currency) | Economic  Perspective | Evaluation  type | Modelling technique | Time horizon | Discount rate (%) | Treatment strategies (experimental vs. control) | Health outcomes | Impact of experimental vs. control strategy on cost | Impact of experimental vs. control strategy on health outcomes | Authors’ cost-effectiveness judgement | WTP |
| AC vs. no AC | II | Ayaci, 2013 [22] | USA (USD) | Healthcare payer | CUA | Markov | 5 years | 3 | 5FU vs. no AC | QALY | Increase | Increase | Cost effective | 50,000 |
| FOLFOX vs. no AC | QALY | Increase | Increase | Not cost-effective |
| III | Smith, 1993 [23] | Australia (AUD) | Healthcare payer | CUA | Decision tree | 20 years | 5 | 5FU+LV vs. no AC | QALY | Increase | Increase | Author did not provide conclusion | Not reported |
| Brown, 1994 [24] | USA (USD) | Societal | CEA | Markov | 30 years | 6 | 5FU+Leva vs. no AC | LY | Increase | Increase | Cost-effective | 50,000 |
| Lairson, 2014 [25] | USA (USD) | Healthcare payer | CUA | Patient level data | Lifetime | 3 | 5FU+LV vs. no AC | QALY | Increase | Increase | Cost-effective | 100,000 |
| FOLFOX vs. no AC | Increase | Increase | Cost-effective |
| II & III | Norum, 1997 [26] | Norway (BP) | Healthcare payer | CUA | Patient level data | Lifetime | 5 | 5FU+Leva vs. no AC | QALY | Increase | Increase | Cost effective | 20,000 |
| Michel, 1999 [27] | France (USD) | Healthcare payer | CEA | Decision tree | 5 years | No discount | AC in stage II and III vs. AC in stage III only | No. of surviving patients | Increase | Increase | Cost-effective | 10,000 |
| Oral vs. IV chemotherapy | III | Cassidy, 2006 [28] | UK (BP) | Societal | CEA, CUA | PSA | Lifetime | 1.5 (cost); 6 (effect) | Capecitabine vs. 5FU | LM, QALM | Decrease | Increase | Capecitabine dominates 5FU | Not reported |
| Eggington, 2006 [29] | UK (BP) | Healthcare payer | CEA, CUA | Markov | 50 years | 6 (cost); 1.5 (effect) | Capecitabine vs. 5FU | LY, QALY | Decrease | Increase | Capecitabine dominates 5FU | 20,000 |
| Ho, 2006 [30] | Canada (CAD) | Societal | CMA | Decision tree | 5 years | NR | XELOX vs. FOLFOX | N/A | Decrease | N/A | N/A | N/A |
| Douillard, 2007 [31] | France (Euro) | Healthcare payer | CC | Decision tree | 3 years | No discount | Capecitabine vs. 5FU | Relapse-free survival | Decrease | Increase | Capecitabine dominates 5FU | Not reported |
| DiConstanzo, 2008 [32] | Italy (Euro) | Healthcare payer | CEA, CUA | PSA | 10 years | 3.5 | Capecitabine vs. 5FU | LM, QALM | Decrease | Increase | Capecitabine dominates 5FU | Not reported |
| Goerner, 2009 [33] | Germany (Euro) | Healthcare payer | Costing analysis | Decision tree | 6 months | NR | Capecitabine vs. 5FU | N/A | Decrease | N/A | N/A | N/A |
| Shiroiwa, 2009 [34] | Japan (Yen) | Healthcare payer | CUA | Markov | 30 years | 3 | Capecitabine vs. 5FU | QALY | Decrease | Increase | Capecitabine dominates 5FU | 0 |
| Hsu, 2011 [35] | UK (BP) | Healthcare payer | CUA | PSA | 10 years | 3 | Capecitabine vs. 5FU | QALM | Decrease | Increase | Capecitabine dominates 5FU | Not reported |
| Xie, 2013 [36] | China (USD) | Societal | Costing analysis | Patient level data | 6 months | No discount | CAPOX vs. FOLFOX | N/A | Decrease | N/A | N/A | N/A |
| Soni, 2014 [37] | US (USD) | Healthcare payer | CUA | Markov | 5 years | 3 | Capecitabine vs. 5FU | QALY | Increase | Decrease | 5FU dominates Capecitabine | 100,000 |
| Chen, 2015 [38] | Taiwan (NT) | Societal | CUA | Patient level data | 28 weeks | No discount | Capecitabine +/- oxaliplatin vs. 5FU  +/- oxaliplatin | Health-related QOL scores | Decrease | No difference | Cost-effective | Not reported |
| Lerdkiattikorn, 2015 [39] | Thailand (Baht) | Societal | CUA | Markov | 99 years | 3 | Capecitabine vs. 5FU | QALY | Increase | Increase | Not cost effective | 300,000 |
| Lin, 2015 [40] | Taiwan (NT) | Societal | Costing analysis | Patient level data | 25 months | No discount | Capecitabine vs. 5FU | Health-related QOL scores | Decrease | No difference | Cost saving | N/A |
| vanGils, 2015 [41] | Netherlands (Euro) | Healthcare sector | Costing analysis | Patient level data | 6 months | No discount | Capecitabine vs. 5FU | N/A | Decrease | N/A | N/A | N/A |
| II & III | Murad, 1997 [42] | Brazil & Argentina (Real) | Healthcare payer | CMA | Decision Tree | 18 months | NR | UFT+LV vs. 5FU+LV | N/A | Decrease | N/A | N/A | N/A |
| Manidakis, 2009 [43] | Greece (Euro) | Societal | CMA | Patient level data | 12 months | NR | CAPOX vs. FOLFOX | N/A | Decrease | N/A | N/A | N/A |
| Wen, 2014 [44] | China (USD) | Societal | CUA | Markov | 6 months | NR | CAPOX vs. FOLFOX | QALY | Decrease | Decrease | Cost-effective | 17815 (3 x GDP) |
| Hsu, 2019 [45] | Taiwan (USD) | Healthcare payer | CMA | Decision Tree | 6 months | NR | UFT+LV vs. 5FU+LV | N/A | Decrease | Increase | N/A | N/A |
| Oxaliplatin vs. no oxaliplatin | II | Ayaci,, 2013 [22] | USA (USD) | Healthcare payer | CUA | Markov | 5 years | 3 | FOLFOX vs. 5FU+LV | QALY | Increase | Increase | Not cost effective | 50,000 |
| III | Pandor, 2006 [46] | UK (BP) | Healthcare payer | CEA, CUA | Markov | 50 years | 6 (cost); 1.5 (effect) | FOLFOX vs. 5FU+LV | QALY | Increase | Increase | Cost-effective | 20,000 |
| FOLFOX vs. 5FU+LV | Increase | Increase | Cost-effective |
| FOLFOX vs. Capecitabine | Increase | Increase | Cost-effective |
| Eggington, 2006 [29] | UK (BP) | Healthcare payer | CEA, CUA | Markov | 50 years | 6 (cost); 1.5 (effect) | FOLFOX vs. 5FU+LV | LY, QALY | Increase | Increase | Cost-effective | 20,000 |
| Aballea, 2007 [47] | UK (BP) | Healthcare payer | CUA | PSA | 50 years | 3.5 | FOLFOX vs. 5FU+LV | QALY | Increase | Increase | Cost effective | 30,000 |
| Aballea., 2007 [48] | USA (USD) | Healthcare payer | CUA | PSA | 50 years | 3 | FOLFOX vs. 5FU+LV | QALY | Increase | Increase | Cost effective | 50 – 100,000 |
| Goerner, 2009 [33] | Germany (Euro) | Healthcare payer | Costing analysis | Decision tree | 6 months | No discount | FOLFOX vs. 5FU+LV | N/A | Increase | N/A | N/A | N/A |
| CAPOX vs. 5FU+LV | Increase | N/A | N/A |
| Attard, 2010 [49] | Canada (CAD) | Healthcare payer | CUA | PSA | 50 years | 5 | FOLFOX vs. 5FU+LV | QALY | Increase | Increase | Cost-effective | Not reported |
| Shiroiwa, 2012 [50] | Japan (Yen) | Healthcare payer | CUA | PSA | 30 years | 3 | FOLFOX vs. 5FU+LV | QALY | Increase | Increase | Cost-effective | 5 million |
| Soni, 2014 [37] | USA (USD) | Healthcare payer | CUA | Markov | 5 years | 3 | FOLFOX vs. 5FU+LV | QALY | Increase | Increase | Cost-effective | 100,000 |
| CAPOX vs. 5FU+LV | QALY | Increase | Decrease | 5FU dominates CAPOX | 100,000 |
| Lerdkiattikorn, 2015 [39] | Thailand (Baht) | Societal | CUA | Markov | 99 years | 3 | FOLFOX vs. 5FU+LV | QALY | Increase | Increase | Not cost effective | 300,000 |
| vanGils, 2015 [41] | Netherlands (Euro) | Healthcare sector | Costing analysis | Patient level data | 6 months | NR | FOLFOX vs. 5FU+LV | N/A | Increase | N/A | N/A | N/A |
| FOLFOX vx. Capecitabine | N/A | Increase | N/A | N/A |
| CAPOX vs. 5FU+LV | N/A | Increase | N/A | N/A |
| CAPOX vs. Capecitabine | N/A | Increase | N/A | N/A |
| 3M vs. 6M | II | Jongeneel, 2020 [51] | Netherlands (Euro) | Societal | CUA | Markov | Lifetime | 4 (cost); 1.5 (effect) | 3M vs. 6M FOLFOX | QALY | Decrease | Decrease | Not cost-effective; negative NMB | 50,000 |
| 3M vs. 6M CAPOX | Decrease | Increase | 3M CAPOX dominates 6M |
| II & III | Robles-Zurita, 2018 [52] | UK (BP) | Healthcare sector | CUA | PSA | 8 years | 3.5 | 3M vs. 6M CAPOX | QALY | Decrease | Increase | 3M dominates 6M | 30,000 |
| Iveson, 2019 [53] | UK (BP) | Healthcare sector | CUA | PSA | 8 years | 3.5 | 3M vs. 6M AC | QALY | Decrease | Increase | 3M dominates 6M | 30,000 |
| Hanna, 2021 [54] | Multi-country (USD) | Healthcare sector | CUA, BIA | Patient level data | 10 year | 3.5 | 3M vs. 6M AC | QALY | Decrease | Increase | Cost effective | 42,000 |
| Biomarker | II | Hornberger, 2012 [56] | USA (USD) | Societal | CUA | Markov | Lifetime | 3 | Oncotype Dx vs. SOC | QALY | Decrease | Increase | Genomic assay dominates SOC | 50,000 |
| Alberts, 2014 [55] | USA (USD) | Healthcare payer | CUA | Markov | Lifetime | 3 | OncotypeDx vs.SOC | QALY | Decrease | Increase | Genomic assay dominates SOC | 50,000 |
| Jongeneel, 2021 [58] | Netherlands (Euros) | Societal | CUA | Markov | Lifetime | 4 (cost); 1.5 (effect) | Biomarker (MSS + BRAF/KRAS) vs. SOC | QALY | Increase | Increase | Cost-effective | 50,000 |
| To, 2021 [57] | Australia (AUD) | Healthcare payer | CUA | Markov | Lifetime | 5 | ctDNA vs. SOC | QALY | Decrease | Increase | ctDNA dominate SOC | 20,000 |
| Alarid-Escuder, 2021 [59] | USA (USD) | Healthcare payer | CUA | Markov | Lifetime | 3 | Biomarker (CDX2) vs. no AC | QALY | Increase | Increase | Cost-effective | 100,000 |
| Other | II & III | Monz, 2003 [60] | Germany (Euros) | Healthcare payer | CEA | Markov | 60 years | 3 | 5FU+Leva+LV vs. 5FU+Leva | df-LY, LY | Increase | Increase | Cost-effective | 51,000 |
| *Abbreviation: 3M (3 month duration of chemotherapy), 6M (6 month duration of chemotherapy), 5FU (5-fluorouracil), AC (Adjuvant chemotherapy), AUD (Australian Dollars), BIA (Budget impact analysis), BP (British Pound), CEA (Cost-effectiveness analysis), CMA (Cost-minimisation analysis), ctDNA (circulating tumour DNA), CUA (Cost-utility analysis), df-LY (Disease-free life-years), IV (intravenous), LV (leucovorin), Leva (levamisole), LY (Life-years), PSA (partitioned survival analysis) ,NT (Taiwan Dollar), NR (Not reported), QALY (Quality-adjusted life years, SOC (standard of care), USD (United State Dollars)* | | | | | | | | | | | | | | |
